# Supplementary material
Source: publisher site journal article supplement (https://www.dovepress.com/article/110883)
Supplement: Supplementary file 1 [file get_supplementary_file.php]

Table S1

English version of the Perceived Efficacy in Patient-Physician Interactions (PEPPI) scale

PEPPI-10 Item Version Perceived Efficacy in Patient-Physician Interactions

**Interviewer:**

**The following 10 questions are about how you interact with doctors as a patient. Please tell me how CONFIDENT you feel in your ability to do each of the following things. Remember, these questions are about your ability to do these things in general and not about any particular doctors.**

**Rate your confidence on a scale of 0 to 10, with 10 meaning extremely confident and 0 meaning not confident at all.**

---

|                                                                                    | Not confident ←————→ Extremely confident |   |   |   |   |   |   |   |   |   |    |
|------------------------------------------------------------------------------------|------------------------------------------|---|---|---|---|---|---|---|---|---|----|
| If the following condition, how confident are you in your ability to:              |                                          |   |   |   |   |   |   |   |   |   |    |
| 1. Get a doctor to pay attention to what you have to say:                          | 0                                        | 1 | 2 | 3 | 4 | 5 | 6 | 7 | 8 | 9 | 10 |
| 2. Know what questions to ask a doctor:                                            | 0                                        | 1 | 2 | 3 | 4 | 5 | 6 | 7 | 8 | 9 | 10 |
| 3. Get a doctor to answer all of your questions:                                   | 0                                        | 1 | 2 | 3 | 4 | 5 | 6 | 7 | 8 | 9 | 10 |
| 4. Ask a doctor questions about your chief health concern:                         | 0                                        | 1 | 2 | 3 | 4 | 5 | 6 | 7 | 8 | 9 | 10 |
| 5. Make the most of your visit with a doctor:                                      | 0                                        | 1 | 2 | 3 | 4 | 5 | 6 | 7 | 8 | 9 | 10 |
| 6. Get a doctor to take your chief health concern seriously:                       | 0                                        | 1 | 2 | 3 | 4 | 5 | 6 | 7 | 8 | 9 | 10 |
| 7. Understand what a doctor tells you:                                             | 0                                        | 1 | 2 | 3 | 4 | 5 | 6 | 7 | 8 | 9 | 10 |
| 8. Get a doctor to do something about your chief health concern:                   | 0                                        | 1 | 2 | 3 | 4 | 5 | 6 | 7 | 8 | 9 | 10 |
| 9. Explain your chief health concern to a doctor:                                  | 0                                        | 1 | 2 | 3 | 4 | 5 | 6 | 7 | 8 | 9 | 10 |
| 10. Ask a doctor for more information if you don't understand what he or she said: | 0                                        | 1 | 2 | 3 | 4 | 5 | 6 | 7 | 8 | 9 | 10 |

---

## PEPPI-10 版本 中文版医患互动效能量表

下面 10 个问题是关于你作为一名患者如何与医生进行交流。请通过分数告诉我在做一下每件事情的时候你对自己的能力有多少信心。记住，这些问题是你与普通的医生做这些事情的能力而不是特别的医生。

你的信心范围为 0~10，10 代表非常有信心，0 代表没有什么信心。

|                             | 没什么信心 ←—————→ 非常有信心 |   |   |   |   |   |   |   |   |   |    |
|-----------------------------|---------------------|---|---|---|---|---|---|---|---|---|----|
| 如果有以下情况，你有多少信心：             |                     |   |   |   |   |   |   |   |   |   |    |
| 1、让医生关注你说的话：                | 0                   | 1 | 2 | 3 | 4 | 5 | 6 | 7 | 8 | 9 | 10 |
| 2、知道问医生什么问题：                | 0                   | 1 | 2 | 3 | 4 | 5 | 6 | 7 | 8 | 9 | 10 |
| 3、从医生那里获得你所有问题的答案：          | 0                   | 1 | 2 | 3 | 4 | 5 | 6 | 7 | 8 | 9 | 10 |
| 4、问医生你关注的主要健康问题：            | 0                   | 1 | 2 | 3 | 4 | 5 | 6 | 7 | 8 | 9 | 10 |
| 5、充分利用自己访问的医生：              | 0                   | 1 | 2 | 3 | 4 | 5 | 6 | 7 | 8 | 9 | 10 |
| 6、让医生重视你的主要健康问题：            | 0                   | 1 | 2 | 3 | 4 | 5 | 6 | 7 | 8 | 9 | 10 |
| 7、理解医生告诉你的内容：               | 0                   | 1 | 2 | 3 | 4 | 5 | 6 | 7 | 8 | 9 | 10 |
| 8、明白医生能够为你所关注的主要健康问题做点什么：   | 0                   | 1 | 2 | 3 | 4 | 5 | 6 | 7 | 8 | 9 | 10 |
| 9、向医生解释你关注的主要健康问题：          | 0                   | 1 | 2 | 3 | 4 | 5 | 6 | 7 | 8 | 9 | 10 |
| 10、如果你不理解医生说的话向他（她）询问更多的信息： | 0                   | 1 | 2 | 3 | 4 | 5 | 6 | 7 | 8 | 9 | 10 |
